# Supplementary material for: The first voltammetric investigation for astilbin based on β-cyclodextrin functionalized graphene modified electrode
Source: Royal Society of Chemistry journal article supplement (doi:10.1039/c6ay01014h), 2016-01-01
Supplement: c6ay01014h1.pdf [file c6ay01014h1.pdf]

## Supplement information

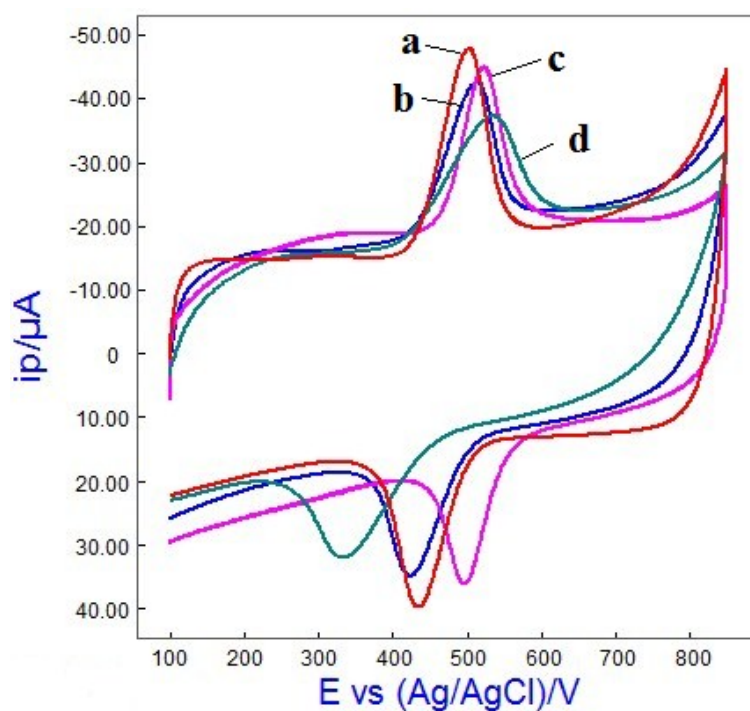

SFig. 1 Cyclic voltammograms of astilbin ( $3 \times 10^{-6} \text{ mol L}^{-1}$ ) in different buffer solution: phosphate buffer (PH 3.0) (a); Britton-Robinson (PH 2.87) (b); sulfuric acid solutions (PH 2.0) (c) and acetate buffer solutions (PH 3.6).
